# Supplementary material
Source: PubMed Central journal article supplement (PMC4206534)
Supplement: auto-10-1549-s01.pdf [file auto-10-1549-s01.pdf]

## **Supplemental Material to:**

**Shun-ichi Yamashita, Kakeru Abe, Yuki Tatemichi,  
and Yukio Fujiki**

**The membrane peroxin PEX3 induces  
peroxisome-ubiquitination-linked pexophagy**

**Autophagy 2014; 10(9)**

**<http://dx.doi.org/10.4161/auto.29329>**

**[www.landesbioscience.com/journals/autophagy/article/29329](http://www.landesbioscience.com/journals/autophagy/article/29329)**

A

CHO-K1

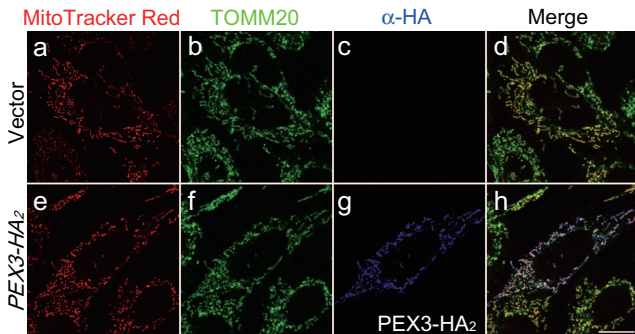

B

CHO-K1

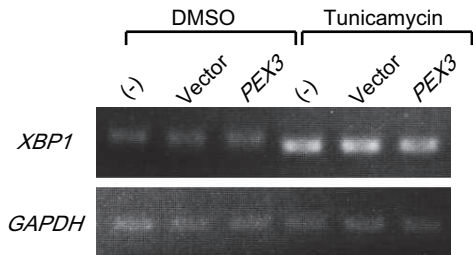

Figure S1

# A CHO-K1

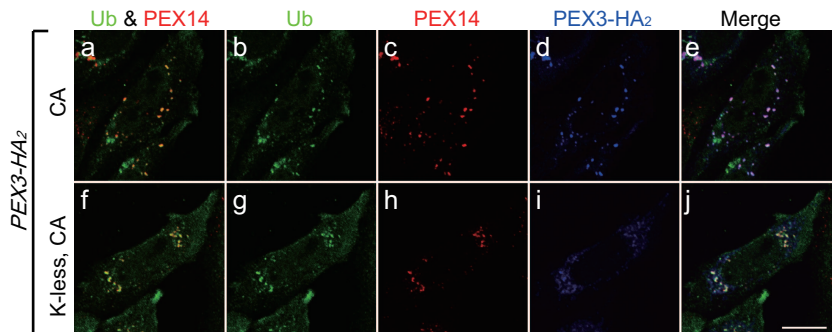

# B CHO-K1

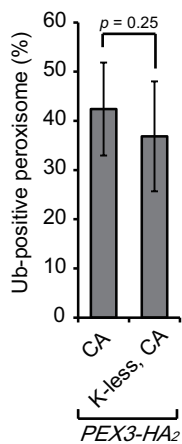

Figure S2

CHO-K1

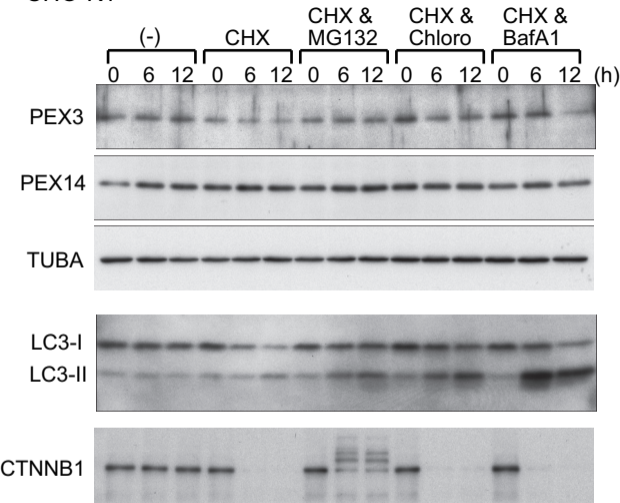

Figure S3

1 **Figure S1.** PEX3 overexpression does not induce mitochondrial depolarization and ER stress.  
2 (A) CHO-K1 cells were transfected with empty vector or *PEX3-HA2*. After 24 h, the cells were  
3 stained with 50 nM MitoTracker Red (a and e) for 15 min, and then fixed and immunostained  
4 with antibodies against TOMM20 (b and f) and HA (c and g). Scale bar: 10  $\mu$ m. (B) CHO-K1  
5 cells were transfected with empty vector or *PEX3-HA2* in the presence of DMSO or  
6 tunicamycin. After 12 h, total RNA was isolated from the cells and subjected to reverse  
7 transcription (RT). To assess the splicing of *XBPI* in response to ER stress, *XBPI* cDNA was  
8 amplified from the RT products using specific primers (upper panel). *GAPDH* cDNA was also  
9 amplified as a control (lower panel).

10

11 **Figure S2.** Overexpression of PEX3-HA2 CA mutants induces peroxisomal ubiquitination. (A)  
12 CHO-K1 cells were transfected with *PEX3-HA2* CA or CA, K-less mutants. After 12 h, the cells  
13 fixed and immunostained with antibodies against ubiquitin (b and g), PEX14 (c and h) and HA  
14 (d and i). Merged view of ubiquitin and PEX14 are shown in a and f. Scale bar: 10  $\mu$ m. (B)  
15 Percentages of peroxisome signals colocalized with ubiquitin were calculated with Metamorph  
16 version 7.6 software from ten cells.

17

18 **Figure S3.** PEX3 is constitutively degraded by the proteasome. CHO-K1 cells were incubated  
19 for 12 h in the presence of cycloheximide (CHX) with a proteasome inhibitor, MG132, and,  
20 lysosome inhibitors, chloroquine (Chloro) and bafilomycinA<sub>1</sub> (BafA1), as indicated at the top.  
21 The cells were lysed with lysis buffer containing 1% TritonX-100 at each 0, 6, and 12 h and  
22 analyzed by SDS-PAGE and immunoblotting with antibodies against PEX3, PEX14, and  
23 TUBA/ $\alpha$ -tubulin. To assess the effect of inhibitors, LC3 (for lysosome activity) and  
24 CTNNB1/ $\beta$ -catenin (for protein synthesis and proteasome activity) were also analyzed.

Table S1. Sequences of siRNAs used in this study

| Name                         | Strand    | Sequence                         |
|------------------------------|-----------|----------------------------------|
| Luciferase (a control) siRNA | Sense     | 5'-UUCACUGGCGACGUAAUCCACGAUC-3'  |
|                              | Antisense | 5'-GAUCGUGGAUUACGUCGCCAGUCAAA-3' |
| Human p62 siRNA              | Sense     | 5'-UACGUGAAGGAUGACAUCUUCGAA-3'   |
|                              | Antisense | 5'-UUCGGAAGAUGUCAUCCUUCACGUA-3'  |
| Human NBR1 siRNA             | Sense     | 5'-UUUACCAUAGCUUCGAUAUCAGCCC-3'  |
|                              | Antisense | 5'-GGGCUGAUUUCGAAGCUAUGGUAAA-3'  |

Table S2. Oligonucleotide primers used in this study

| Name               | Sequence (5' to 3')                                          |
|--------------------|--------------------------------------------------------------|
| p62FwEco           | GGAATTCGCGTCGTTACCGGTGAAGGCCTATC                             |
| p62RvXho           | CCGCTCGAGTCACAATGGTGGAGGGTGCTTCG                             |
| NBR1FwNot          | GCCGGCGGGCCGCTCGAACCACAGGTTACTCTAAATGT<br>GAC                |
| NBR1RvXba          | GCTCTAGATCAATAGCGGTGGCTGTACCAGTCGTTG                         |
| NBR1D50RFw         | CTATCCAGATAAAATACCTGCGTGAGGAGAACGAGGAG<br>ATATC              |
| NBR1D50RRv         | GATATCTCCTCGTTCTCCTCACGCAGGTATTTTATCTGG<br>ATAG              |
| NBR1DCCFw          | CATTTATGGAATTCAATCCATGGACTTCAGAG                             |
| NBR1DCCRv          | GAGCCTGACTTGTTCCAAAGCAGCAGGCAGACG                            |
| NBR1DLIR2Fw        | GAAGAAACAGAAGAAGACCTGAGTGGGACCC                              |
| NBR1DLIR2Rv        | TCTTGTCTTCTGTGAGGCACTGGCTCCTG                                |
| NBR1Y750AFw        | CTGCTTCCTCTGAAGATGCTATCATCATCCTTCCTGAG                       |
| NBR1Y750ARv        | CTCAGGAAGGATGATGATAGCATCTTCAGAGGAAGCAG                       |
| NBR1DJ-UBAFw       | GTTTCTGAAGATCAGACCACAGCCCTGATGGCCC                           |
| NBR1DJ-UBARv       | GTCACAGCTCCTCTGTCTGCTGTTTGCGAGTCC                            |
| NBR1DUBARv         | GCTCTAGATCAGATGGGCTGTGCAGTGACTGGTGGCC<br>CAG                 |
| NBR1DC-termRv      | GCTCTAGATCATGGGGGAAGTTCGTGCATGGTAGC                          |
| NBR1siRNA-resistFw | GGCAATGGTGAAAGTTTCATTTGATCTGAATACTATCCA<br>GATAAAATACCTGGATG |
| NBR1siRNA-resistRv | TCAACGTCTGCCAGGTTGTATTTTCTGGATCCGAAAC<br>CAGAAAGCTTTGAGTTTC  |

---

|                     |                                                                  |
|---------------------|------------------------------------------------------------------|
| LC3BFwEco           | GGAATTCCTCCGAGAAGACCTTCAAGCAGCG                                  |
| LC3BRvXho           | CCGCTCGAGTTACACAGCCATTGCTGTCCCGAATGTC                            |
| PEX3-K0-fragment1Fw | CGGGATCCGCCACCATGCTGAGATCAATGTGGAATTTT<br>CTGAGACGTACAGAAGGAGATG |
| PEX3-K0-fragment1Rv | CTAAGTCTTCTCTGTCCATATCTTCCCAGG                                   |
| PEX3-K0-fragment2   | CTTATTATCCTTAGATCCTCCCATATTTCCAGCCTGTTT<br>GAAGGCCTGTTTCTCAAC    |
| PEX3-K0-fragment3Fw | GGCAGAAATGGCACTAGCATCCTAGC                                       |
| PEX3-K0-fragment3Rv | GAATGTCTAAGAGAAATACTTCCTAAGATCCTCTGCACA<br>GCTTGTCTAATGACAG      |
| PEX3-K0-fragment4Fw | GTCCCTTTTGGACTTGGAGCAGAGACTGAGAGAAATAA<br>G                      |
| PEX3-K0-fragment4Rv | CATGTAGTGGCACAGGGAAGACCTGGATGCGTCTCTAT<br>C                      |
| PEX3-K0-fragment5Fw | CCACTATTAGACTTCTCAATGAGACAAG                                     |
| PEX3-K0-fragment5Rv | GATTATCCTGGCTAAAGGGAGGCTGACACTGG                                 |
| PEX3-K0-fragment6Fw | CGTGCAGGATCTGCTGATGATGGAGCAAGTGAGAGAC<br>TTTGC                   |
| PEX3-K0-fragment6Rv | CCGCTCGAGTCATCTCTCCAGTTGTTGGGGGGTG                               |

---
